|                  |                | NA   | Ap   | Ac   | F    | Phe   | Ant   | Fl   | Pyr  | BaA  | Chr  | BbF  | BkF  | BaP  | Ip    | DBahA | BghiP |
|------------------|----------------|------|------|------|------|-------|-------|------|------|------|------|------|------|------|-------|-------|-------|
| aCO <sub>2</sub> | <b>Mean</b>    | 7.62 | 1.40 | 0.68 | 5.58 | 32.50 | 30.95 | 0.83 | 2.89 | 4.88 | 4.18 | 0.32 | N.D. | 0.80 | 11.44 | N.D.  | 0.55  |
|                  | <b>SE</b>      | 0.38 | 0.21 | 0.08 | 0.61 | 4.38  | 4.16  | 0.57 | 0.06 | 0.26 | 0.79 | 0.05 |      | 0.00 | 1.06  |       | 0.14  |
| eCO <sub>2</sub> | <b>Mean</b>    | 7.29 | 1.10 | 0.54 | 4.72 | 31.24 | 29.77 | 1.73 | 3.02 | 5.23 | 4.61 | 0.38 |      | 0.83 | 7.57  |       | 0.87  |
|                  | <b>SE</b>      | 0.38 | 0.05 | 0.06 | 0.63 | 3.49  | 3.32  | 0.48 | 0.38 | 1.07 | 1.12 | 0.07 |      | 0.27 | 1.88  |       | 0.28  |
|                  | <b>F-value</b> | 0.35 | 1.84 | 1.68 | 0.96 | 0.05  | 0.05  | 1.48 | 0.11 | 0.10 | 0.08 | 0.27 |      | 0.02 | 3.22  |       | 1.30  |
|                  | <b>P-value</b> | 0.58 | 0.25 | 0.29 | 0.38 | 0.83  | 0.84  | 0.31 | 0.76 | 0.77 | 0.80 | 0.64 |      | 0.91 | 0.22  |       | 0.34  |
